# Supplementary material for: Birth Outcomes and Maternal Residential Proximity to Natural Gas Development in Rural Colorado
Source: PubMed Central journal article supplement (PMC3984231; doi:10.1289/ehp.1306722), 2014-01-28
Supplement: ehp.1306722.s001.pdf [file ehp.1306722.s001.pdf]

## **Birth Outcomes and Maternal Residential Proximity to Natural Gas Development in Rural Colorado**

Lisa M. McKenzie, Ruixin Guo, Roxana Z. Witter, David A. Savitz, Lee S. Newman, and John L. Adgate

### **Table of Contents**

|                                                                                                                                                                                                              |          |
|--------------------------------------------------------------------------------------------------------------------------------------------------------------------------------------------------------------|----------|
| <b>Table S1.</b> Association of Congenital Heart Defects, Neural Tube Defects, and Oral Clefts Before and After 1998 to Estimate Effect of Introduction of Folic Acid Fortification in 1998                  | <b>2</b> |
| <b>Table S2.</b> Association Between Inverse Distance Weighted Well Count within Two- and Five-Mile Radii of Maternal Residence and Ten-Mile Radius Births Between 2000-2009 and Congenital Heart Defects    | <b>3</b> |
| <b>Table S3.</b> Association Between Inverse Distance Weighted Well Count within Two- and Five-Mile Radii of Maternal Residence and Ten-Mile Radius Births Between 2000-2009 and Neural Tube Defects.        | <b>4</b> |
| <b>Table S4.</b> Association Between Inverse Distance Weighted Well Count within Two- and Five-Mile Radii of Maternal Residence and Ten-Mile Radius Births Between 2000-2009 and Oral Clefts.                | <b>5</b> |
| <b>Table S5.</b> Association Between Inverse Distance Weighted Well Count within Two- and Five-Mile Radii of Maternal Residence and Ten Mile Radius Births Between 2000-2009 and Preterm Birth.              | <b>6</b> |
| <b>Table S6.</b> Association Between Inverse Distance Weighted Well Count within Two- and Five-Mile Radii of Maternal Residence and Ten-Mile Radius Births Between 2000-2009 and Full Term Low Birth Weight. | <b>7</b> |
| <b>Table S7.</b> Association Between Inverse Distance Weighted Well Count within Two- and Five-Mile Radii of Maternal Residence and Ten-Mile Radius Births Between 2000-2009 and Full Term Birth Weight.     | <b>8</b> |

**Table S1.** Association of Congenital Heart Defects, Neural Tube Defects, and Oral Clefts Before and After 1998 to Estimate Effect of Introduction of Folic Acid Fortification in 1998<sup>a</sup>.

| <b>Birth Outcome</b>                  | <b>Cases (n)</b> | <b>Crude OR (95% CI)</b> | <b>Adjusted OR (95% CI)</b>   |
|---------------------------------------|------------------|--------------------------|-------------------------------|
| Congenital Heart Defects <sup>b</sup> | 1823             | 1.1 (0.95, 1.3)          | 1.1 (0.97, 1.3) <sup>b</sup>  |
| Neural Tube Defects <sup>c</sup>      | 59               | 0.67 (0.34, 1.3)         | 0.67 (0.34, 1.3) <sup>c</sup> |
| Oral Clefts <sup>b</sup>              | 251              | 1.1 (0.76, 1.7)          | 1.1 (0.76, 1.7) <sup>b</sup>  |

<sup>a</sup>Odds ratios represent the prevalence of each outcome after 1998 compared to births before 1998. Births in 1998 not included in analysis. <sup>b</sup>Adjusted for maternal age, ethnicity, smoking, alcohol use, education, and elevation of residence, as well as infant parity and gender. <sup>c</sup>Adjusted for elevation of maternal residence.

**Table S2.** Association Between Inverse Distance Weighted Well Count within Two- and Five-Mile Radii of Maternal Residence and Ten-Mile Radius Births Between 2000-2009 and Congenital Heart Defects.

| <b>Inverse Distance Weighted Well Count</b> | <b>Parameter</b>                  | <b>Two Mile Radius<sup>a</sup></b> | <b>Five Mile Radius<sup>b</sup></b> | <b>Ten Mile Radius 2000-2009<sup>c</sup></b> |
|---------------------------------------------|-----------------------------------|------------------------------------|-------------------------------------|----------------------------------------------|
| <b>No Wells</b>                             | Live Births                       | 97899                              | 81649                               | 48749                                        |
|                                             | Cases (n)                         | 1351                               | 1101                                | 676                                          |
|                                             | Crude OR                          | 1                                  | 1                                   | 1                                            |
| <b>Low</b>                                  | Live Births                       | 8891                               | 14253                               | 14773                                        |
|                                             | Cases (n)                         | 147                                | 233                                 | 225                                          |
|                                             | Crude OR                          | 1.2                                | 1.2                                 | 1.1                                          |
|                                             | Adjusted OR (95% CI) <sup>d</sup> | 1.2 (0.97, 1.4)                    | 1.2 (1.0, 1.4)                      | 1.1 (0.93, 1.3)                              |
| <b>Medium</b>                               | Live Births                       | 8892                               | 14255                               | 14772                                        |
|                                             | Cases (n)                         | 161                                | 236                                 | 237                                          |
|                                             | Crude OR                          | 1.3                                | 1.2                                 | 1.2                                          |
|                                             | Adjusted OR (95% CI) <sup>d</sup> | 1.3 (1.1, 1.6)                     | 1.2 (1.1, 1.4)                      | 1.2 (0.99, 1.4)                              |
| <b>High</b>                                 | Live Births                       | 9160                               | 14685                               | 15220                                        |
|                                             | Cases (n)                         | 164                                | 253                                 | 286                                          |
|                                             | Crude OR                          | 1.3                                | 1.3                                 | 1.4                                          |
|                                             | Adjusted OR (95% CI) <sup>d</sup> | 1.3 (1.1, 1.5)                     | 1.3 (1.1, 1.5)                      | 1.4 (1.2, 1.6)                               |

<sup>a</sup>Low = first tertile, 1 to 156 wells per mile, medium = second tertile, 157 to 388 wells per mile, high = third tertile, 389 to 1400 wells per mile. <sup>b</sup>Low = first tertile, 1 to 20.1 wells per mile, medium = second tertile, 20.2 to 229 wells per mile, high = third tertile, 230 to 1400 wells per mile. <sup>c</sup>Low = first tertile, 1 to 3.87 wells per mile, medium = second tertile, 3.88 to 166 wells per mile, high = third tertile 167 to 1400 wells per mile. <sup>d</sup>Adjusted for maternal age, ethnicity, smoking, alcohol use, education, and elevation of residence, as well as infant parity and gender

**Table S3.** Association Between Inverse Distance Weighted Well Count within Two- and Five-Mile Radii of Maternal Residence and Ten-Mile Radius Births Between 2000-2009 and Neural Tube Defects.

| <b>Inverse Distance Weighted Well Count</b> | <b>Parameter</b>                  | <b>Two-Mile Radius<sup>a</sup></b> | <b>Five-Mile Radius<sup>b</sup></b> | <b>Ten-Mile Radius 2000-2009<sup>c</sup></b> |
|---------------------------------------------|-----------------------------------|------------------------------------|-------------------------------------|----------------------------------------------|
| <b>No Wells</b>                             | Live Births (N)                   | 97899                              | 81649                               | 48749                                        |
|                                             | Cases (n)                         | 39                                 | 31                                  | 21                                           |
|                                             | Crude OR                          | 1                                  | 1                                   | 1                                            |
|                                             | Adjusted OR (95% CI) <sup>d</sup> | 1.0 (0.37, 3.0)                    | 0.83 (0.31, 2.2)                    | 0.65 (0.23, 1.8)                             |
| <b>Low</b>                                  | Live Births (N)                   | 8891                               | 14253                               | 14773                                        |
|                                             | Cases (n)                         | < 5 <sup>e</sup>                   | 5                                   | 5                                            |
|                                             | Crude OR                          | 1.1                                | 0.92                                | 0.79                                         |
|                                             | Adjusted OR (95% CI) <sup>d</sup> | 1.0 (0.37, 3.0)                    | 0.83 (0.31, 2.2)                    | 0.65 (0.23, 1.8)                             |
| <b>Medium</b>                               | Live Births (N)                   | 8892                               | 14255                               | 14772                                        |
|                                             | Cases (n)                         | 8                                  | 12                                  | 6                                            |
|                                             | Crude OR                          | 2.3                                | 2.2                                 | 0.94                                         |
|                                             | Adjusted OR (95% CI) <sup>d</sup> | 2.1 (0.95, 4.5)                    | 2.0 (1.0, 4.0)                      | 0.82 (0.32, 2.1)                             |
| <b>High</b>                                 | Live Births (N)                   | 9160                               | 14685                               | 15220                                        |
|                                             | Cases (n)                         | 8                                  | 11                                  | 11                                           |
|                                             | Crude OR                          | 2.2                                | 2.0                                 | 1.7                                          |
|                                             | Adjusted OR (95% CI) <sup>d</sup> | 1.9 (0.86, 4.3)                    | 1.7 (0.81, 3.6)                     | 1.4 (0.60, 3.1)                              |

<sup>a</sup>Low = first tertile, 1 to 156 wells per mile, medium = second tertile, 157 to 388 wells per mile, high = third tertile, 389 to 1400 wells per mile. <sup>b</sup>Low = first tertile, 1 to 20.1 wells per mile, medium = second tertile, 20.2 to 229 wells per mile, high = third tertile, 230 to 1400 wells per mile. <sup>c</sup>Low = first tertile, 1 to 3.87 wells per mile, medium = second tertile, 3.88 to 166 wells per mile, high = third tertile, 167 to 1400 wells per mile. <sup>d</sup>Adjusted for elevation of maternal residence. <sup>e</sup>Counts of < 5 are not reported to protect identity of subjects.

**Table S4.** Association Between Inverse Distance Weighted Well Count within Two- and Five-Mile Radii of Maternal Residence and Ten-Mile Radius Births Between 2000-2009 and Oral Clefts.

| <b>Inverse Distance Weighted Well Count</b> | <b>Parameter</b>                  | <b>Two-Mile Radius<sup>a</sup></b> | <b>Five-Mile Radius<sup>b</sup></b> | <b>Ten-Mile Radius 2000-2009<sup>c</sup></b> |
|---------------------------------------------|-----------------------------------|------------------------------------|-------------------------------------|----------------------------------------------|
| <b>No Wells</b>                             | Live Births (N)                   | 97899                              | 81649                               | 48749                                        |
|                                             | Cases (n)                         | 195                                | 165                                 | 98                                           |
|                                             | Crude OR                          | 1                                  | 1                                   | 1                                            |
| <b>Low</b>                                  | Live Births (N)                   | 8891                               | 14253                               | 14773                                        |
|                                             | Cases (n)                         | 19                                 | 27                                  | 25                                           |
|                                             | Crude OR                          | 1.1                                | 0.94                                | 0.84                                         |
|                                             | Adjusted OR (95% CI) <sup>d</sup> | 0.99 (0.62, 1.6)                   | 0.83 (0.54, 1.3)                    | 0.73 (0.46, 1.2)                             |
| <b>Medium</b>                               | Live Births (N)                   | 8892                               | 14255                               | 14772                                        |
|                                             | Cases (n)                         | 22                                 | 34                                  | 26                                           |
|                                             | Crude OR                          | 1.2                                | 1.2                                 | 0.88                                         |
|                                             | Adjusted OR (95% CI) <sup>d</sup> | 1.2 (0.73, 1.8)                    | 1.0 (0.70, 1.5)                     | 0.77 (0.49, 1.2)                             |
| <b>High</b>                                 | Live Births (N)                   | 9160                               | 14685                               | 15220                                        |
|                                             | Cases (n)                         | 15                                 | 25                                  | 31                                           |
|                                             | Crude OR                          | 0.82                               | 0.84                                | 1.0                                          |
|                                             | Adjusted OR (95% CI) <sup>d</sup> | 0.76 (0.44, 1.3)                   | 0.77 (0.49, 1.2)                    | 0.87 (0.55, 1.4)                             |

<sup>a</sup>Low = first tertile, 1 to 156 wells per mile, medium = second tertile, 157 to 388 wells per mile, high = third tertile, 389 to 1400 wells per mile. <sup>b</sup>Low = first tertile, 1 to 20.1 wells per mile, medium = second tertile, 20.2 to 229 wells per mile, high = third tertile, 230 to 1400 wells per mile. <sup>c</sup>Low = first tertile, 1 to 3.87 wells per mile, medium = second tertile, 3.88 to 166 wells per mile, high = third tertile 167 to 1400 wells per mile. <sup>d</sup>Adjusted for maternal age, ethnicity, smoking, alcohol use, education, and elevation of residence, as well as infant parity and gender.

**Table S5.** Association Between Inverse Distance Weighted Well Count within Two- and Five-Mile Radii of Maternal Residence and Ten-Mile Radius Births Between 2000-2009 and Preterm Birth.

| <b>Inverse Distance Weighted Well Count</b> | <b>Parameter</b>                  | <b>Two-Mile Radius<sup>a</sup></b> | <b>Five-Mile Radius<sup>b</sup></b> | <b>Ten-Mile Radius 2000-2009<sup>c</sup></b> |
|---------------------------------------------|-----------------------------------|------------------------------------|-------------------------------------|----------------------------------------------|
| <b>No Wells</b>                             | Live Births (N)                   | 96230                              | 80274                               | 47914                                        |
|                                             | Cases (n)                         | 6994                               | 5887                                | 3642                                         |
|                                             | Crude OR                          | 1                                  | 1                                   | 1                                            |
| <b>Low</b>                                  | Live Births (N)                   | 8722                               | 13983                               | 14513                                        |
|                                             | Cases (n)                         | 604                                | 1086                                | 1046                                         |
|                                             | Crude OR                          | 0.95                               | 1.1                                 | 0.94                                         |
|                                             | Adjusted OR (95% CI) <sup>d</sup> | 0.97 (0.89, 1.1)                   | 1.1 (0.99, 1.1)                     | 0.91 (0.84, 0.99)                            |
| <b>Medium</b>                               | Live Births (N)                   | 8701                               | 13976                               | 14502                                        |
|                                             | Cases (n)                         | 517                                | 820                                 | 956                                          |
|                                             | Crude OR                          | 0.8                                | 0.79                                | 0.86                                         |
|                                             | Adjusted OR (95% CI) <sup>d</sup> | 0.86 (0.79, 0.95)                  | 0.83 (0.76, 0.89)                   | 0.87 (0.80, 0.94)                            |
| <b>High</b>                                 | Live Births (N)                   | 8975                               | 14395                               | 14893                                        |
|                                             | Cases (n)                         | 655                                | 977                                 | 993                                          |
|                                             | Crude OR                          | 1.0                                | 0.92                                | 0.87                                         |
|                                             | Adjusted OR (95% CI) <sup>d</sup> | 1.0 (0.94, 1.1)                    | 0.96 (0.89, 1.0)                    | 0.88 (0.81, 0.96)                            |

<sup>a</sup>Low = first tertile, 1 to 156 wells per mile, medium = second tertile, 157 to 388 wells per mile, high = third tertile, 389 to 1400 wells per mile. <sup>b</sup>Low = first tertile, 1 to 20.1 wells per mile, medium = second tertile, 20.2 to 229 wells per mile, high = third tertile, 230 to 1400 wells per mile. <sup>c</sup>Low = first tertile, 1 to 3.87 wells per mile, medium = second tertile, 3.88 to 166 wells per mile, high = third tertile, 167 to 1400 wells per mile. <sup>d</sup>Adjusted for maternal age, ethnicity, smoking, alcohol use, education, and elevation of residence, as well as infant parity and gender.

**Table S6.** Association Between Inverse Distance Weighted Well Count within Two- and Five-Mile Radii of Maternal Residence and Ten-Mile Radius Births Between 2000-2009 and Full Term Low Birth Weight.

| <b>Inverse Distance Weighted Well Count</b> | <b>Parameter</b>                  | <b>Two-Mile Radius<sup>a</sup></b> | <b>Five-Mile Radius<sup>b</sup></b> | <b>Ten-Mile Radius 2000-2009<sup>c</sup></b> |
|---------------------------------------------|-----------------------------------|------------------------------------|-------------------------------------|----------------------------------------------|
| <b>No Wells</b>                             | Live Births (N)                   | 89231                              | 74382                               | 44268                                        |
|                                             | Cases (n)                         | 3129                               | 2785                                | 1683                                         |
|                                             | Crude OR                          | 1                                  | 1                                   | 1                                            |
|                                             | Adjusted OR (95% CI) <sup>d</sup> | 0.80 (0.68, 0.93)                  | 0.96 (0.86, 1.1)                    | 0.97 (0.86, 1.1)                             |
| <b>Low</b>                                  | Live Births (N)                   | 8118                               | 12897                               | 13466                                        |
|                                             | Cases (n)                         | 189                                | 391                                 | 395                                          |
|                                             | Crude OR                          | 0.66                               | 0.79                                | 0.77                                         |
|                                             | Adjusted OR (95% CI) <sup>d</sup> | 0.86 (0.74, 1.0)                   | 0.88 (0.77, 0.99)                   | 0.86 (0.76, 0.97)                            |
| <b>Medium</b>                               | Live Births (N)                   | 8181                               | 13154                               | 13546                                        |
|                                             | Cases (n)                         | 189                                | 327                                 | 360                                          |
|                                             | Crude OR                          | 0.65                               | 0.66                                | 0.69                                         |
|                                             | Adjusted OR (95% CI) <sup>d</sup> | 0.99 (0.85, 1.2)                   | 0.93 (0.81, 1.1)                    | 0.89 (0.78, 1.0)                             |
| <b>High</b>                                 | Live Births (N)                   | 8317                               | 13414                               | 13896                                        |
|                                             | Cases (n)                         | 209                                | 342                                 | 330                                          |
|                                             | Crude OR                          | 0.71                               | 0.65                                | 0.62                                         |
|                                             | Adjusted OR (95% CI) <sup>d</sup> | 0.99 (0.85, 1.2)                   | 0.93 (0.81, 1.1)                    | 0.89 (0.78, 1.0)                             |

<sup>a</sup>Low = first tertile, 1 to 156 wells per mile, medium = second tertile, 157 to 388 wells per mile, high = third tertile, 389 to 1400 wells per mile. <sup>b</sup>low = first tertile, 1 to 20.1 wells per mile, medium = second tertile, 20.2 to 229 wells per mile, high = third tertile, 230 to 1400 wells per mile. <sup>c</sup>Low = first tertile, 1 to 3.87 wells per mile, medium = second tertile, 3.88 to 166 wells per mile, high = third tertile 167 to 1400 wells per mile. <sup>d</sup>Adjusted for maternal age, ethnicity, smoking, alcohol use, education, and elevation of residence, as well as infant parity, gender, and gestational age.

**Table S7.** Association Between Inverse Distance Weighted Well Count within Two- and Five-Mile Radii of Maternal Residence and Ten-Mile Radius Births Between 2000-2009 and Full Term Birth Weight.

| <b>Inverse Distance Weighted Well Count</b> | <b>Parameter</b>                                     | <b>Two-Mile Radius<sup>a</sup></b> | <b>Five-Mile Radius<sup>b</sup></b> | <b>Ten-Mile Radius 2000-2009<sup>c</sup></b> |
|---------------------------------------------|------------------------------------------------------|------------------------------------|-------------------------------------|----------------------------------------------|
| <b>No Wells</b>                             | Live Births (N)                                      | 89231                              | 74382                               | 44268                                        |
|                                             | Mean difference in birth weight (grams) <sup>d</sup> | 0                                  | 0                                   | 0                                            |
| <b>Low</b>                                  | Live Births (N)                                      | 8118                               | 12897                               | 13466                                        |
|                                             | Mean difference in birth weight (grams) <sup>d</sup> | 29 (20, 39)                        | 21 (13, 29)                         | 4.2 (-4.2, 13)                               |
| <b>Medium</b>                               | Live Births (N)                                      | 8181                               | 13154                               | 13546                                        |
|                                             | Mean difference in birth weight (grams) <sup>d</sup> | 20 (11, 30)                        | 28 (20, 35)                         | 19 (11, 27)                                  |
| <b>High</b>                                 | Live Births (N)                                      | 8317                               | 13414                               | 13896                                        |
|                                             | Mean difference in birth weight (grams) <sup>d</sup> | 15 (5, 24)                         | 18 (10, 26)                         | 25 (17, 34)                                  |

<sup>a</sup>Low = first tertile, 1 to 156 wells per mile, medium = second tertile, 157 to 388 wells per mile, high = third tertile, 389 to 1400 wells per mile. <sup>b</sup>Low = first tertile, 1 to 20.1 wells per mile, medium = second tertile, 20.2 to 229 wells per mile, high = third tertile, 230 to 1400 wells per mile. <sup>c</sup>Low = first tertile, 1 to 3.87 wells per mile, medium = second tertile, 3.88 to 166 wells per mile, high = third tertile, 167 to 1400 wells per mile. <sup>d</sup>Adjusted for maternal age, ethnicity, smoking, alcohol use, education, and elevation of residence, as well as infant parity, gender, and gestational age.
